# Supplementary material for: Insulin-like Growth Factor (IGF) and Insulin-like Growth Factor Binding Proteins (IGFBP) as Predictors of Type 2 Diabetes Risk in Obese Adults
Source: Research Square preprint supplement (doi:10.21203/rs.3.rs-7114864/v1), 2025-07-29
Supplement: Supplementary file 1 [file 8a206df259fad0800baf95a9.docx]

**SUPPLEMENTARY MATERIALS**

Supplementary Table 1: Assay details and inter-plate coefficients of variation (CV) for IGF1 and IGFBPs

| **Supplementary Table 1: Assay details and inter-plate coefficients of variation (CV) for IGF1 and IGFBPs** | | | |
| --- | --- | --- | --- |
| **Protein** | **Assay Used** | **Manufacturer / Cat#** | **Overall inter-plate CV%** |
| IGFBP1 | R-PLEX Human IGFBP-1 | Meso Scale Discovery, Rockville, MD/ K151F5R | 38.28% |
| IGFBP2 | R-PLEX Human IGFBP-2 | Meso Scale Discovery, Rockville, MD/ K151AAVR | 30.43% |
| IGFBP3 | R-PLEX Human IGFBP-3 | Meso Scale Discovery, Rockville, MD/ K151D2R | 29.09% |
| IGFBP4 | R-PLEX Human IGFBP-4 | Meso Scale Discovery, Rockville, MD/ K151AJDR | 29.92% |
| IGFBP6 | R-PLEX Human Antibody Set IGFBP-6 | Meso Scale Discovery, Rockville, MD/ F21N8 | 25.19% |
| IGFBP7 | R-PLEX Human Antibody Set IGFBP-7 | Meso Scale Discovery, Rockville, MD/ F21ALY | 15.60% |
| IGFBP8 | R-PLEX Human IGFBP-8 | Meso Scale Discovery, Rockville, MD/ K151N8R | 32.04% |
| IGF1 | Quantikine ELISA | USA R&D Systems, Inc., Minneapolis, MN/ DG100B | 6.2% |

Supplementary Table 2: Sex-specific differences in baseline characteristics of the sample

| **Supplementary Table 2: Sex-specific differences in baseline characteristics** | | |
| --- | --- | --- |
| **Characteristics** | **Male** **(n=30)** | **Female (n=50)** |
| Race | 16 (53%) White  14 (47%) African American | 24 (48%) White  26 (52%) African American |
| Age (years), mean (SD) | 42.0 (11.3) | 45.3 (12.2) |
| Glucose (mg/dl), mean (SD) | 96.0 (10.5) | 93.4 (11.3) |
| Body Mass Index (kg/m2), mean (SD) | 35.0 (3.7) * | 38.1 (7.9) * |
| IGF1 (ng/ml), median (IQR) | 1685.3 (1090.5, 2207.2) | 1397.9 (1026.6, 2042.1) |
| IGFBP1 (ng/ml), median (IQR) | 20.5 (14.0, 39.0) * | 36.3 (18.0, 52.5) * |
| IGFBP2 (ng/ml), median (IQR) | 148.2 (110.5, 184.4) | 134.9 (105.8, 200.1) |
| IGFBP3 (ng/ml), median (IQR) | 2748.8 (2241.7, 3220.7) | 3101.0 (2371.0, 3538.0) |
| IGFBP4 (pg/ml), median (IQR) | 52362.1 (46799.4, 64816.7) | 58079.7 (47896.5, 68678.6) |
| IGFBP6 (ng/ml), median (IQR) | 457.2 (382.9, 537.2) * | 383.5 (328.8, 427.5) * |
| IGFBP7 (ng/ml), median (IQR) | 135.4 (116.8, 151.2) | 136.3 (113.5, 152.8) |
| Follow-up time (years), median (IQR) | 12.2 (11.8, 13.0) | 12.2 (11.6, 13.0) |
| Developed diabetes within the follow-up period, number (%) | 15 (50%) | 1. (44%) |
| * p < 0.05 | | |

Supplementary Table 3: Race-specific differences in baseline characteristics of the sample

| **Supplementary Table 3: Race-specific differences in baseline characteristics** | | |
| --- | --- | --- |
| **Characteristics** | **White (n=40)** | **African American (n=40)** |
| Sex | 16 (40%) Male  24 (60%) Female | 14 (35%) Male  26 (65%) Female |
| Subgroup | 20 (50%) in Case subgroup  20 (50%) in Cohort subgroup | 20 (50%) in Case subgroup  20 (50%) in Cohort subgroup |
| Age (years), mean (SD) | 43.8 (11.5) | 44.0 (12.0) |
| Glucose (mg/dl), mean (SD) | 95.1 (9.9) | 94.2 (12.5) |
| Body Mass Index (kg/m2), mean (SD) | 35.2 (4.7) * | 38.7 (8.1) * |
| IGF1 (ng/ml), median (IQR) | 1532.8 (1067.5, 2204.8) | 1365.9 (1060.7, 2011.3) |
| IGFBP1 (ng/ml), median (IQR) | 36.8 (22.3, 55.9) * | 19.2 (15.0, 39.3) * |
| IGFBP2 (ng/ml), median (IQR) | 158.8 (126.2, 217.0) * | 123.3 (99.3, 172.8) * |
| IGFBP3 (ng/ml), median (IQR) | 3187.7 (2203.4, 3653.9) | 2917.1 (2441.1, 3202.7) |
| IGFBP4 (pg/ml), median (IQR) | 57368.0 (46786.5, 66323.8) | 54442.4 (47680.0, 65223.5) |
| IGFBP6 (ng/ml), median (IQR) | 414.6 (355.2, 464.1) | 391.5 (334.4, 514.7) |
| IGFBP7 (ng/ml), median (IQR) | 137.3 (119.2, 151.4) | 130.4 (113.0, 155.7) |
| * p < 0.05 | | |

Supplementary Table 4: Spearman correlation of biomarkers with age

| **Supplementary Table 4: Spearman Correlation of Biomarkers with Age** | |
| --- | --- |
| **Biomarker** | **Spearman coefficient** |
| IGF1 (ng/ml) | -0.26 * |
| IGFBP1 (ng/ml) | 0.22 * |
| IGFBP2 (ng/ml) | 0.19 |
| IGFBP3 (ng/ml) | -0.08 |
| IGFBP4 (pg/ml) | -0.06 |
| IGFBP6 (ng/ml) | -0.01 |
| IGFBP7 (ng/ml) | 0.23 * |
| * p < 0.05 | |
